# Supplementary material for: Altered Functional Connectivity between Emotional and Cognitive Resting State Networks in Euthymic Bipolar I Disorder Patients
Source: PLoS One. 2014 Oct 24;9(10):e107829. doi: 10.1371/journal.pone.0107829 (PMC4208743; doi:10.1371/journal.pone.0107829)
Supplement: Table S1 — Voxel-wise spatial overlap (Pearson's r) of RSNs of interest with gray matter, white matter, cerebrospinal fluid masks and templates of RSNs. (XLSX) [file pone.0107829.s002.xlsx]

## Sheet: Tabelle1
Table S1. Voxel-wise spatial overlap (Pearson's r) of RSNs of interest with gray matter, white matter, cerebrospinal fluid masks and templates of RSNs from Laird et al. 2011
Component number	Network	Gray matter (r)	White matter (r)	Cerebrospinal fluid (r)	Corresponding template (Laird et al. 2011)	Spatial overlap with Laird templates (r)	Functions (Laird et al. 2011)
7	Meso-paralimbic	0.13	0.02	0.02	1	0.5	Emotion/interoception processing
16	Salient	0.24	0.06	0.03	4	0.53	Linking cognition and emotion/interoception
24	Left frontoparietal	0.19	0.05	0.01	18	0.31	Language encoding and recognition
25	Right frontoparietal	0.21	0.06	0.01	15	0.48	Attention, inhibition and memory
33	Anterior default mode	0.16	0.02	0.02	13	0.46	Theory of mind/social cognition
40	Posterior default mode	0.19	0.02	0.01	13	0.55	Theory of mind/social cognition
